# Supplementary material for: Sensory laterality in affiliative interactions in domestic horses and ponies (Equus caballus)
Source: PubMed Central journal article supplement (PMC6097077; doi:10.1007/s10071-018-1196-9), 2018-06-09
Supplement: 10071_2018_1196_MOESM3_ESM.pdf [file 10071_2018_1196_MOESM3_ESM.pdf]

## Supplementary material: Details of statistical analysis performed in R Studio and R commander (version 3.4.1, 2017)

Call:

```
glm(formula = friendly_lat_index ~ age + domestication_num + gender_num +  
group_num + rank + social_index, family = gaussian(identity),  
data = Dataset)
```

Deviance Residuals:

| Min      | 1Q       | Median   | 3Q      | Max     |
|----------|----------|----------|---------|---------|
| -0.25847 | -0.05255 | -0.01936 | 0.06754 | 0.17684 |

Coefficients:

|                   | Estimate  | Std. Error | t value | Pr(> t )   |
|-------------------|-----------|------------|---------|------------|
| (Intercept)       | -0.457774 | 0.128112   | -3.573  | 0.00154 ** |
| age               | 0.001554  | 0.003878   | 0.401   | 0.69219    |
| domestication_num | 0.053735  | 0.095284   | 0.564   | 0.57802    |
| gender_num        | 0.050475  | 0.052285   | 0.965   | 0.34398    |
| group_num         | 0.007565  | 0.037812   | 0.200   | 0.84312    |
| rank              | 0.088735  | 0.095671   | 0.928   | 0.36290    |
| social_index      | 0.102087  | 0.076831   | 1.329   | 0.19644    |

---

Signif. codes: 0 '\*\*\*' 0.001 '\*\*' 0.01 '\*' 0.05 '.' 0.1 ' ' 1

(Dispersion parameter for gaussian family taken to be 0.01225402)

Null deviance: 0.41659 on 30 degrees of freedom  
Residual deviance: 0.29410 on 24 degrees of freedom  
AIC: -40.419

Number of Fisher Scoring iterations: 2

**Spearman correlations:**

|                    | age    | friendly_lat_index |
|--------------------|--------|--------------------|
| age                | 1.0000 | 0.0517             |
| friendly_lat_index | 0.0517 | 1.0000             |

Number of observations: 31

Pairwise two-sided p-values:

|                    | age    | friendly_lat_index |
|--------------------|--------|--------------------|
| age                |        | 0.7824             |
| friendly_lat_index | 0.7824 |                    |

**wilcoxon rank sum test** with continuity correction

data: friendly\_lat\_index by domestication

W = 65, p-value = 0.09425

alternative hypothesis: true location shift is not equal to 0

RcmdrMsg: [6] WARNUNG: warning in wilcox.test.default(x = c(-0.09, -0.08, -0.33,

RcmdrMsg+ -0.45, -0.35, :

RcmdrMsg+ cannot compute exact p-value with ties
